# Supplementary material
Source: PubMed Central journal article supplement (PMC534630)
Supplement: nar_32_20_6129__1.pdf [file nar_32_20_6129__1.pdf]

## Supplementary Material

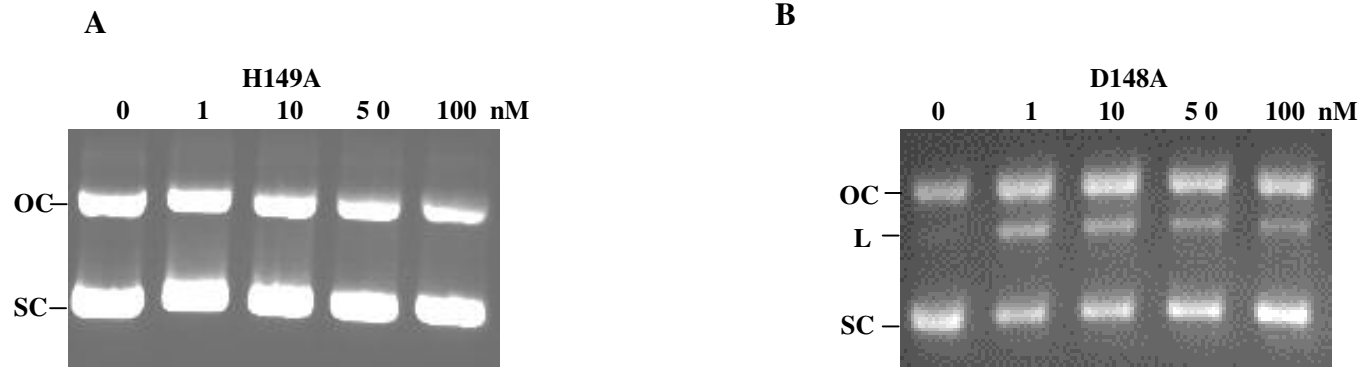

**DNA cleavage analysis with H149A and D148A mutants of R.KpnI:** Purified enzymes (A) H149A and (B) D148A were incubated with pUC18 DNA in the standard assay buffer and conditions (Materials and Methods) and the products were electrophoresed on 1 % agarose gel. The concentration of the enzyme used is depicted in each panel. SC, L and OC indicate the supercoiled, linear and open circular forms of the DNA

## Supplementary Material

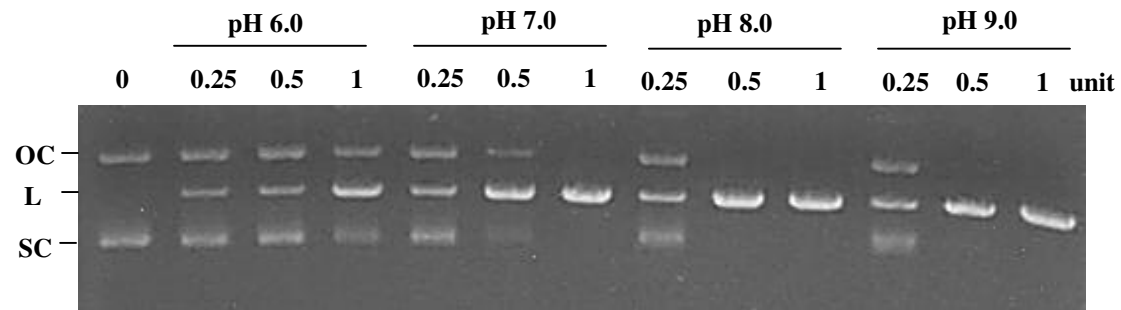

**Cleavage profile of R.KpnI at different pH:** DNA (pUC18, 500 ng) was digested at different pH by using 0.25, 0.5 and 1 unit of R.KpnI. The reactions were carried out at 37° C for 1 h and the products were analyzed on 1.0% agarose gel. SC, L and OC indicate the super coiled, linear and open circular forms of pUC18. The enzyme showed complete DNA cleavage at pH 6.0 when 2 units of enzyme was used
